# Supplementary material
Source: HighWire-hosted journal article supplement (https://heart.bmj.com/content/108/7/558)
Supplement: inline-supplementary-material-2 [file inline-supplementary-material-2.pdf]

**Supplementary 2 Themes and code groups**

---

**Theme 1 The Concept of SDM**

---

Aim of SDM  
SDM behaviour and activities  
Comparison SDM and informed consent  
Professional's expertise  
SDM in AS guidelines  
Patient participation in SDM  
Appropriate care and cure  
Patient's motivation for treatment  
Professionals' views on SDM  
Professionals' views on patients  
Conditions for SDM  
Collaboration between professionals

---

---

**Theme 2 Knowledge**

---

Knowledge regarding patients' goals and wishes for health improvement  
Type of information provision regarding treatment possibilities  
Facilitators for information provision  
Communication regarding goals and wishes for health improvement  
Professionals' views on patients' knowledge and patients' communication  
Patients' attitude regarding decision-making  
Patients' understanding and knowledge of severe AS  
Discrepancy between the patient's treatment wishes and actual treatment options  
Assumptions for SDM  
Communication skills regarding explaining treatment options  
Decision aids  
Patients' knowledge and understanding of treatment options  
Barriers in communication

---

---

**Theme 3 Communication and interaction**

---

Professionals' views on patients' communication skills  
Leaving decisions to others  
Involvement of others in decision-making  
Involving patients in the conversation  
Differences in patient engagement  
Factors relating to patients' age  
Aspects of a positive attitude of patients towards SDM  
Patient characteristics related to patient participation  
Processing of information  
Effect of relatives on SDM  
Characteristics of relatives  
Experience with relatives  
Professionals' empathy and interest  
Relationship of patient and professional  
Professionals' qualities for SDM  
Professionals' conversational skills  
Facilitators for conversational skills  
Barriers for conversational skills  
Attention for communication in educational courses  
Facilitators for communication in educational courses

---

---

**Theme 4 Implementation of SDM**

---

Experiences regarding decision-making  
Experiences with decision-making in the heart team  
Barriers for SDM in the heart team  
Barriers for SDM: time and setting  
Organisational constraints for SDM  
Facilitators regarding the referring heart centre  
Facilitators regarding the organisation of the AS care path  
Informing patients about SDM  
Implementation of SDM  
Attention for SDM in the organisation  
Health insurance  
Effect of SDM: improvements  
Facilitators regarding reimbursement

---

SDM shared decision making

AS aortic stenosis
