# Supplementary material
Source: HighWire-hosted journal article supplement (https://heart.bmj.com/content/108/7/558)
Supplement: inline-supplementary-material-3 [file inline-supplementary-material-3.pdf]

**Supplementary 3 Elements of the four primary themes structured in the adapted taxonomy<sup>[1]</sup>**

| Category <sup>[1]</sup>         | Details of category <sup>[1]</sup>                      | Element of primary theme                                                           | Primary theme                            |
|---------------------------------|---------------------------------------------------------|------------------------------------------------------------------------------------|------------------------------------------|
| Predisposing factors            | Patient characteristics                                 | Patients' communication skills                                                     | Communication and interaction            |
|                                 |                                                         | Patients' positive attitude for involvement in SDM                                 | Communication and interaction            |
|                                 |                                                         | Complicating patient characteristics                                               | Communication and interaction            |
|                                 |                                                         | Passive patient role                                                               | Communication and interaction            |
|                                 | Decision characteristics                                | -                                                                                  |                                          |
| Interactional context factors   | Power (im)balance in the patient-clinician relationship | Roles for patients and professionals                                               | The concept of SDM                       |
|                                 |                                                         | Informal caregivers' interest in decision-making                                   | Communication and interaction            |
|                                 |                                                         | Informal caregivers' help in processing information                                | Communication and interaction            |
|                                 | Interpersonal characteristics of the clinician          | Informal caregivers' leading position                                              | Communication and interaction            |
|                                 |                                                         | Professionals showing commitment                                                   | Communication and interaction            |
|                                 | Trust                                                   | Communication techniques                                                           | Communication and interaction            |
| Preparation for a SDM encounter | Perceived need for preparation                          | Professionals expressing empathy                                                   | Communication and interaction            |
|                                 |                                                         | Definition of SDM                                                                  | The concept of SDM                       |
|                                 | Expectation of outcome of being involved in SDM         | Aim of SDM<br>Effects of SDM                                                       | The concept of SDM<br>The concept of SDM |
| Preparation for the SDM process | Providing information about options                     | Patients' knowledge of treatment options                                           | Knowledge                                |
|                                 |                                                         | Increase of patient knowledge                                                      | Knowledge                                |
|                                 |                                                         | Professionals' knowledge of patients' goals and preferences for health improvement | Knowledge                                |
|                                 |                                                         |                                                                                    |                                          |

|                                |                                | Increase of professional knowledge                 | Knowledge                     |
|--------------------------------|--------------------------------|----------------------------------------------------|-------------------------------|
|                                | Terminology used by HP's       | -                                                  |                               |
|                                | Decision support               | -                                                  |                               |
| Social context                 | View of colleagues             | -                                                  |                               |
|                                | Culture of network             | -                                                  |                               |
|                                | Collaboration                  | Interdisciplinary collaboration                    | Implementation of SDM         |
|                                | Leadership and social learning | Lack of attention for professionals' communication | Communication and interaction |
| Organisational context         | Organisational characteristics | Collaboration in the pathway for severe AS         | Implementation of SDM         |
|                                | Capacities                     | -                                                  |                               |
|                                | Organisational constraints     | Time constraints                                   | Implementation of SDM         |
|                                |                                | Available information for heart team               | Implementation of SDM         |
| Economic and political context | Policy                         | Patient empowerment                                | Implementation of SDM         |
|                                |                                | Re-imburement criteria for treatment               | Implementation of SDM         |

AS aortic stenosis

HP health professional

SDM shared decision making

1 Pel-Littel RE, Snaterse M, Teppich NM, et al. Barriers and facilitators for shared decision making in older patients with multiple chronic conditions: a systematic review. *BMC Geriatr.* 2021;21:112-021-02050-y.
